# Supplementary material
Source: HighWire-hosted journal article supplement (https://www.cmajopen.ca/highwire/filestream/81275/field_highwire_adjunct_files/0/2018-0174-1-at.pdf)

Appendix 1 (as supplied by the authors): Supplementary figures

Supplementary Figure S1: Trends by sex R1

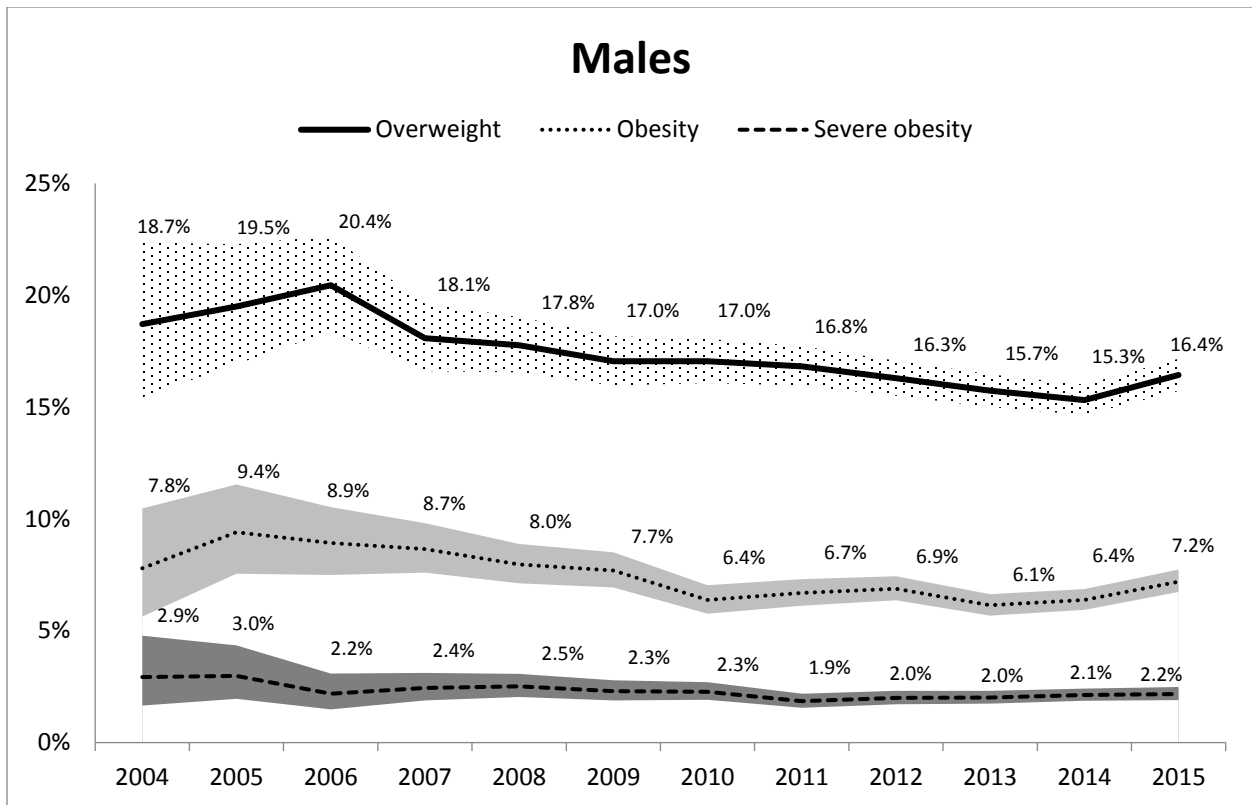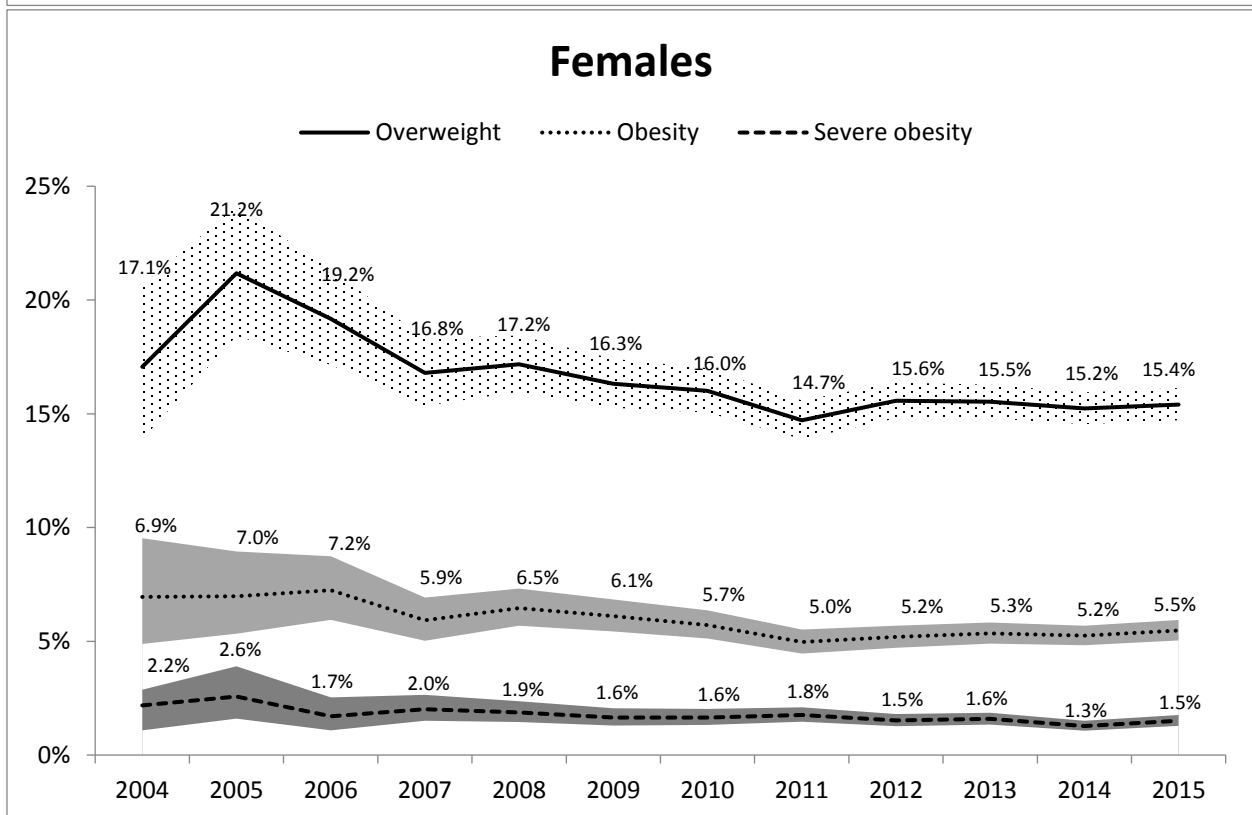

Supplementary Figure S2: Age groups

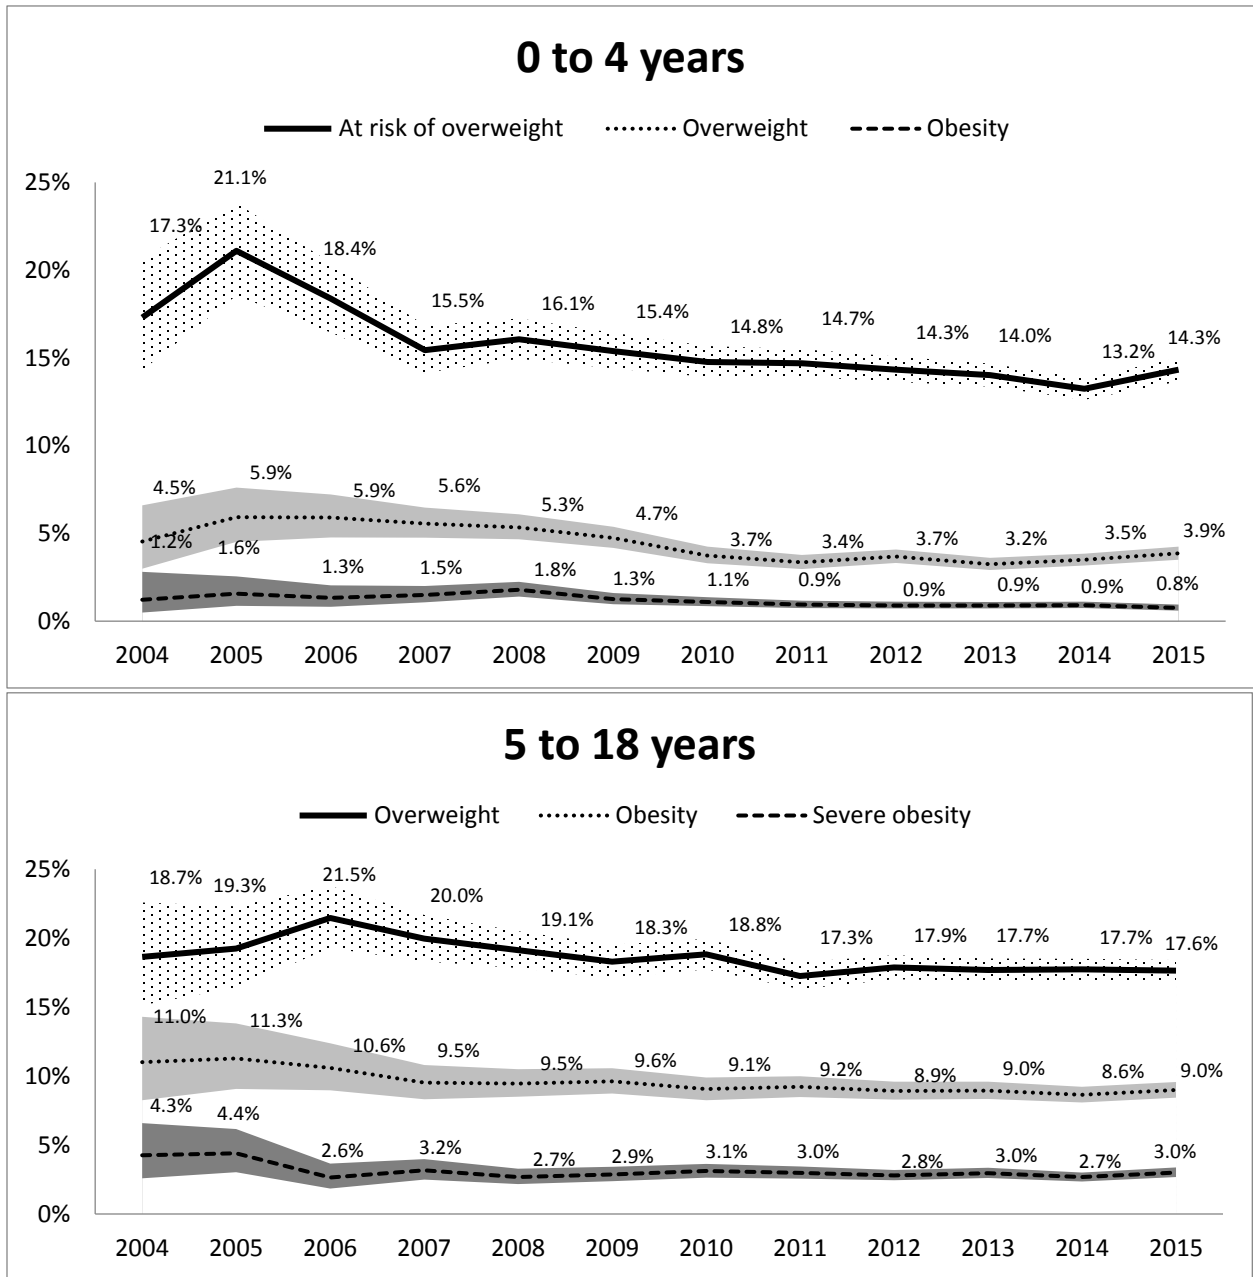

Supplementary Figure S3A: 0–4 yr

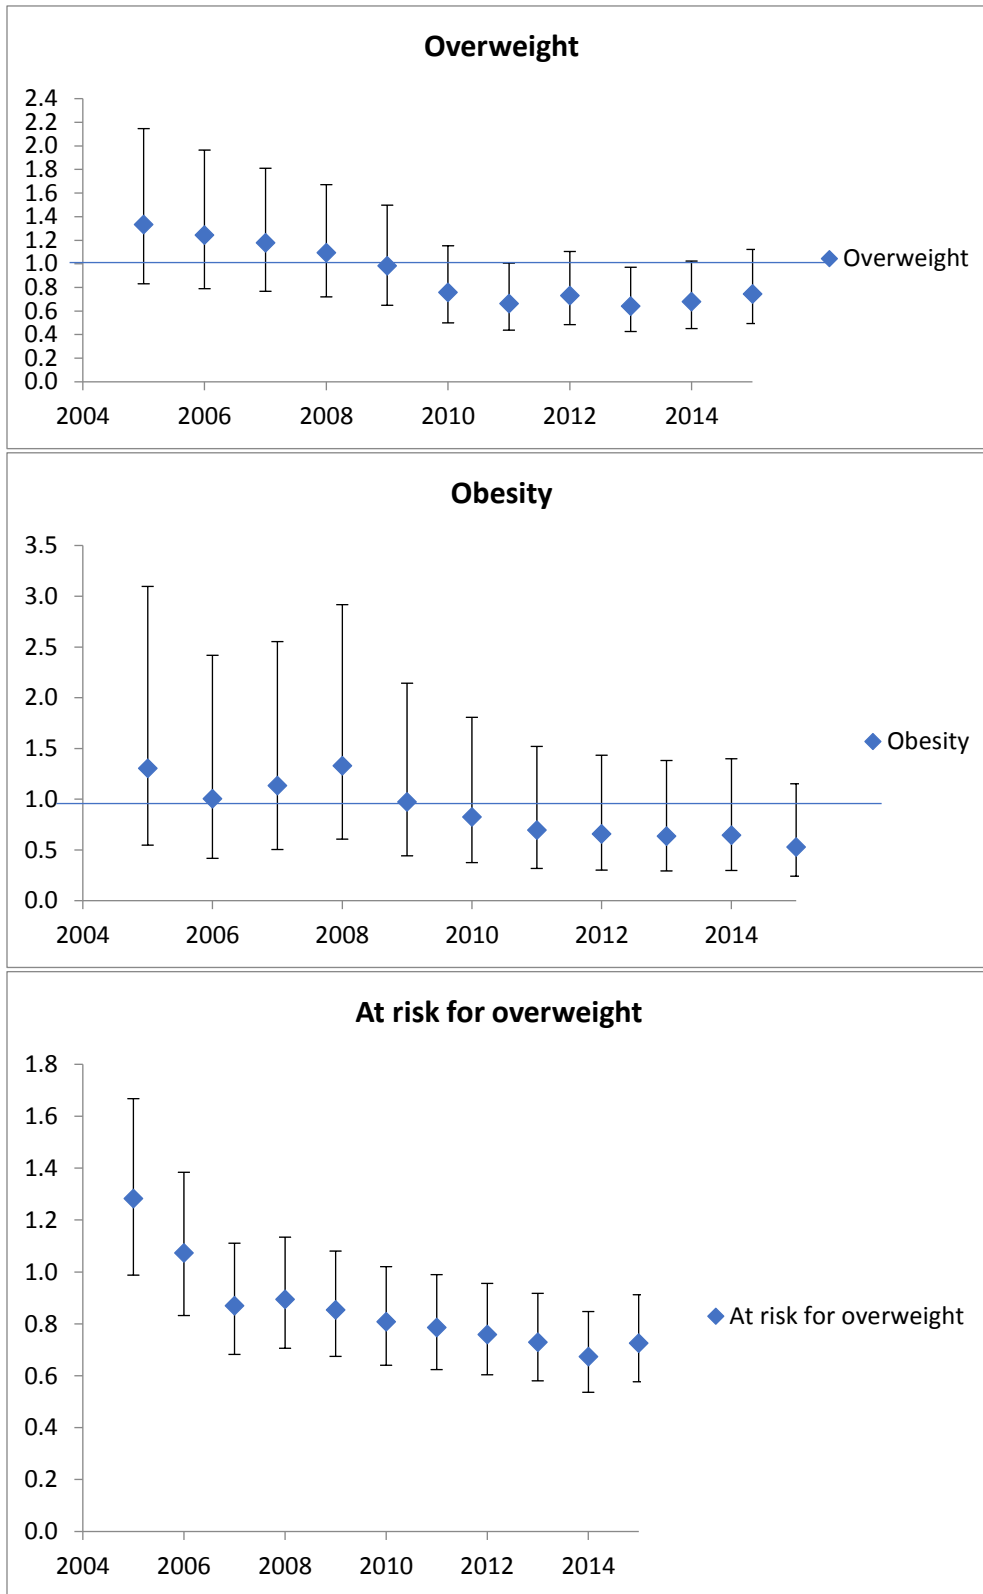

Supplementary Figure S3B: 5–18 yr

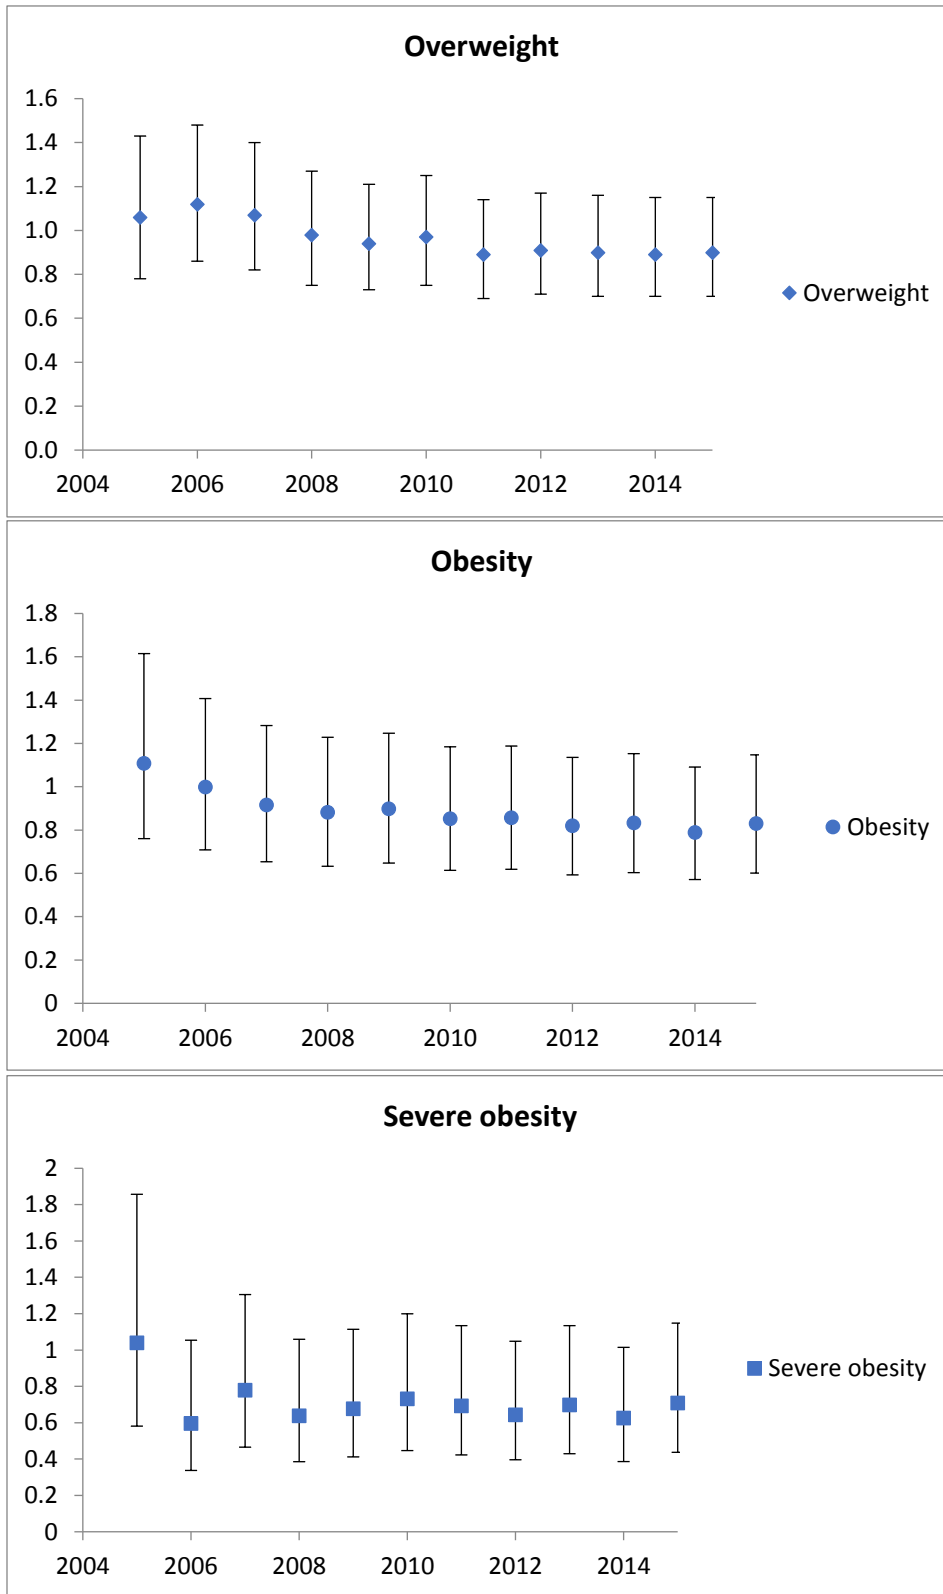

Supplement: 2018-0174-1-at.pdf [file 2018-0174-1-at.pdf]
